# Supplementary material for: Acute hyperventilation increases the central venous-to-arterial PCO2 difference in stable septic shock patients
Source: Ann Intensive Care. 2017 Mar 20;7:31. doi: 10.1186/s13613-017-0258-5 (PMC5359263; doi:10.1186/s13613-017-0258-5)
Supplement: Supplementary file 1 — Additional file 1. Manuscript data set. [file 13613_2017_258_MOESM1_ESM.xls]

## Sheet: Sheet1
ID	Age	Gender	FIO2	Vti_1	Peepext_1	RR_1	Plateau_P_1	HR_1	PAM_1	PAM_2	IRVS_1	Bicarb_1	EBec_1	SaO2_1	lactate_1	Vti_2	Pplateau_2	HR_2	CI_1	CI_2	IVEj_1	IVEj_2	IRVS_2	PaCO2_1	PaCO2_2	PvCO2_1	PvCO2_2	Bicar_2	EBec_2	SaO2_2	lactate_2	pHV_1	pHV_2	HB	pHA_1	pHA_2	GapCO2_1	GapCO2_2	ScvO2_1	ScvO2_2	weight	Height	SOFA	BMI	SAPS_II	RR_2	VM_1	VM_2	CaO2_1
1	67	F	0.5	280	10	20	26	69	84	75	2214	26.6	2	97	1.5	280	28	93	2.53	2.43	36.6	26.2	2530	42	36	46	41	26.4	2.4	97	1.6	7.39	7.43	9	7.41	7.45	4	5	68	66	60	1.53	7	25.6312	34	30	5600	8400	11.9592
2	47	F	0.3	360	6	18	20	119	64	64	1861	22.8	-3.2	93	2	360	19	120	1.89	1.98	15.9	16.5	1822	43	30	49	38	21.7	-3.1	95	2.3	7.3	7.35	10.9	7.33	7.48	6	8	65	56	88	1.72	13	29.7458	53	28	6480	10080	13.6445
3	68	M	0.4	380	10	20	25	85	75	77	1148	24.6	-1.8	98	0.8	380	26	88	4.25	4.27	50	48.5	1180	50	41	54	44	23.7	-1.6	97	1.1	7.28	7.35	10.2	7.3	7.33	4	3	80	79	75	1.65	7	27.5482	47	30	7600	11400	13.7666
4	69	M	0.4	550	5	22	17	92	88	94	1491	24.8	0	97	1.3	550	21	88	3.48	3.47	37.9	39.4	1636	40	30	44	36	23.6	0.3	98	1.4	7.37	7.45	8.6	7.4	7.49	4	6	77	73	80	1.75	16	26.1224	27	32	12100	17600	11.4483
5	75	F	0.7	430	8	20	30	90	67	63	1213	27.5	-0.7	96	0.7	430	30	87	3.1	2.88	34.4	33.1	1195	72	58	78	68	26.6	-0.3	96	0.7	7.18	7.24	10.2	7.19	7.27	6	10	74	69	63	1.58	11	25.2363	70	30	8600	12900	13.4153
6	58	M	0.8	450	8	18	24	79	82	89	1546	27.9	3.1	94	1.1	450	24	75	3.47	3.32	43.9	44.2	1784	45	33	49	42	26.3	3.3	97	1.4	7.39	7.45	14.2	7.4	7.51	4	9	70	61	105	1.7	10	36.3322	30	28	8100	12600	18.0963
7	60	M	0.5	500	8	17	26	80	76	80	1620	24.8	-1.1	98	0.5	500	20	81	3.26	3.32	40.7	41	2142	47	36	53	45	24.8	-0.2	97	0.7	7.29	7.32	9.9	7.33	7.39	6	9	81	68	90	1.85	13	26.2966	55	27	8500	13500	13.3637
8	73	F	0.3	500	8	15	20	90	66	70	1007	23.9	-0.5	98	1	500	20	87	4.84	4.73	53.8	54.4	1605	37	26	41	29	24.5	1.6	96	1	7.41	7.48	9.6	7.42	7.52	4	3	78	77	65	1.75	10	21.2245	83	25	7500	12500	12.8917
9	55	M	0.8	470	8	20	24	79	82	89	1546	27.9	3.1	94	1.1	450	24	75	3.47	3.32	43.9	44.2	1784	45	33	49	42	26.3	3.3	97	1.4	7.39	7.45	8.7	7.4	7.51	4	9	78	69	96	1.78	11	30.2992	30	30	9400	13500	11.1685
10	66	F	0.5	300	10	18	26	66	84	75	2212	26.6	2	97	1.5	280	28	69	2.42	2.32	36.6	34.2	2532	41	36	46	42	26.4	2.4	97	1.6	7.39	7.43	9.6	7.4	7.42	5	6	68	68	66	1.55	13	27.4714	34	28	5400	7840	12.7391
11	45	M	0.3	500	8	15	25	121	64	64	1861	22.6	-3.1	92	2	500	24	124	1.83	1.92	15.1	15.5	1822	44	34	49	41	21.7	-3.1	95	2.4	7.3	7.35	10	7.33	7.42	5	7	64	56	73	1.8	15	22.5309	83	25	7500	12500	12.535
12	44	F	0.5	450	6	20	27	81	77	86	1320	24.6	-1.8	98	0.8	450	26	84	3.82	4	47.2	47.6	1677	49	40	54	44	23.7	-1.6	97	1.1	7.28	7.35	9.8	7.31	7.35	5	4	62	54	82	1.66	10	29.7576	64	30	9000	13500	13.2414
13	74	F	0.8	440	12	22	22	78	78	81	1641	24.8	0	95	0.6	440	12	78	2.55	2.54	32.6	32.4	2064	40	31	44	37	23.6	0.3	98	0.9	7.37	7.45	8.9	7.39	7.41	4	6	80	77	125	1.65	9	45.9137	60	32	9680	14080	11.5697
14	50	F	0.4	450	8	20	24	85	75	79	1573	27.5	-0.7	94	1.3	450	26	87	2.9	2.92	34.4	33.5	1927	71	58	78	69	26.6	-0.3	96	1.6	7.18	7.24	9.9	7.18	7.23	7	11	70	65	80.5	1.72	7	27.2107	59	30	9000	13500	12.683
15	62	M	0.3	480	6	15	16	73	89	91	2415	27.9	3.1	98	1.2	480	16	74	2.23	2.13	30.6	28.9	2969	47	34	50	42	26.3	3.3	99	1.4	7.39	7.45	13.4	7.38	7.5	3	8	73	63	80	1.8	12	24.6914	38	25	7200	12000	17.9269
16	44	F	0.4	470	10	20	20	85	74	80	1474	24.8	-1.1	98	0.9	470	20	86	2.73	2.78	34.1	32.4	1942	48	38	53	46	24.8	-0.2	99	1.1	7.29	7.32	9.2	7.32	7.41	5	8	71	58	70	1.65	15	25.7117	96	30	9400	14100	12.4084
17	60	M	0.3	500	10	18	27	94	87	86	1925	24.1	-0.5	98	1	500	28	90	3.15	3.08	33.5	34.2	2531	37	29	41	32	24.5	1.6	96	1	7.41	7.48	9	7.42	7.43	4	3	78	78	84	1.78	12	26.5118	73	28	9000	14000	12.1038
18	56	F	0.8	460	8	20	24	88	82	89	1544	27.9	3.1	94	1.1	450	24	84	2.61	2.62	29.6	31.2	1782	44	30	49	40	26.3	3.3	97	1.4	7.39	7.45	8.3	7.4	7.53	5	10	78	69	81	1.75	12	26.449	30	30	9200	13500	10.6647
[truncated: 23 more columns]
